# Supplementary material for: High prevalence of non-O157 Shiga toxin-producing Escherichia coli in beef cattle detected by combining four selective agars
Source: PubMed Central journal article supplement (PMC6728992; doi:10.1186/s12866-019-1582-8), 2019-09-05
Supplement: 12866_2019_1582_MOESM1_ESM.pdf [file 12866_2019_1582_MOESM1_ESM.pdf]

**Table S1. Prevalence of *stx* and STEC in beef cattle feces**

| Sample | Real-time PCR (Ct)      |                         | Chromogenic agars |        |        |         |
|--------|-------------------------|-------------------------|-------------------|--------|--------|---------|
|        | <i>stx</i> <sub>1</sub> | <i>stx</i> <sub>2</sub> | MAC               | CH-ECC | RBA-NT | CH-STEC |
| Z001   | 35.72                   | 34.94                   | -                 | -      | -      | -       |
| Z002   | 25.80                   | 25.07                   | -                 | -      | +      | -       |
| Z003   | 23.09                   | 22.53                   | -                 | -      | +      | -       |
| Z004   | 26.30                   | 25.38                   | -                 | -      | +      | +       |
| Z005   | 26.87                   | 26.09                   | -                 | -      | +      | +       |
| Z006   | 24.43                   | 22.58                   | -                 | +      | +      | +       |
| Z007   | 20.64                   | 18.91                   | +                 | -      | +      | +       |
| Z008   | 25.96                   | 25.87                   | +                 | -      | +      | +       |
| Z009   | 28.25                   | 28.31                   | -                 | -      | +      | +       |
| Z010   | 36.06                   | 34.23                   | -                 | -      | -      | -       |
| Z011   | 29.92                   | 29.63                   | +                 | -      | +      | +       |
| Z012   | 23.06                   | 25.05                   | +                 | +      | +      | +       |
| Z013   | -                       | 21.05                   | -                 | -      | +      | -       |
| Z014   | -                       | -                       | -                 | -      | -      | -       |
| Z015   | 24.31                   | 22.05                   | -                 | +      | +      | +       |
| Z016   | 27.34                   | 26.79                   | -                 | +      | +      | -       |
| Z017   | 36.47                   | 35.30                   | -                 | -      | +      | -       |
| Z018   | 31.09                   | 30.01                   | -                 | -      | +      | -       |
| Z019   | 23.45                   | 22.52                   | +                 | -      | -      | -       |
| Z020   | 31.15                   | 27.09                   | -                 | -      | +      | +       |
| Z021   | 30.51                   | 26.32                   | -                 | -      | +      | +       |
| Z022   | 27.79                   | 26.08                   | -                 | -      | +      | +       |
| Z023   | 22.38                   | 21.59                   | -                 | -      | +      | +       |
| Z024   | 27.78                   | 31.84                   | -                 | -      | -      | -       |
| Z025   | 19.95                   | 21.20                   | -                 | -      | +      | -       |
| Z026   | 23.99                   | 23.99                   | -                 | -      | +      | +       |
| Z027   | 25.75                   | 20.67                   | -                 | -      | -      | -       |
| Z028   | 21.63                   | 22.22                   | +                 | -      | +      | -       |
| Z029   | 24.98                   | 24.33                   | -                 | -      | +      | +       |
| Z030   | 23.75                   | 23.47                   | -                 | -      | +      | +       |
| Z031   | 20.00                   | 18.59                   | -                 | +      | +      | +       |
| Z032   | 23.17                   | 20.82                   | -                 | -      | +      | +       |
| Z033   | 22.44                   | 22.17                   | +                 | +      | +      | +       |

|       |       |       |   |   |   |   |
|-------|-------|-------|---|---|---|---|
| Z034  | 24.50 | 25.84 | - | - | + | - |
| Z035  | -     | 18.94 | + | + | - | + |
| Z036  | 22.82 | 22.93 | - | + | - | - |
| Z037  | 23.19 | 23.51 | + | + | + | + |
| Z038  | -     | -     | - | - | - | - |
| Z039  | -     | -     | - | - | - | - |
| Z040  | 20.89 | 21.59 | + | + | + | + |
| Z041  | 30.87 | 32.42 | - | - | + | - |
| Z042  | -     | -     | - | - | - | - |
| Z043  | -     | -     | - | - | - | - |
| Z044  | 25.17 | 25.10 | - | - | - | - |
| Z045  | 19.39 | 19.25 | + | - | - | - |
| Z046  | 29.24 | 32.92 | - | - | + | + |
| Z047  | 24.09 | 26.58 | - | + | + | + |
| Z048  | 17.64 | 18.68 | + | + | + | + |
| Z049  | -     | -     | - | - | - | - |
| Z050  | -     | 23.07 | - | - | - | - |
| Z051  | 35.28 | 32.02 | - | - | + | + |
| Z052  | -     | 29.50 | - | - | + | + |
| Z053  | -     | 21.65 | + | + | - | - |
| Z054  | 34.15 | 34.98 | - | - | - | - |
| Z055  | 28.44 | 29.10 | - | - | - | - |
| Z056  | 28.82 | 25.86 | - | - | + | - |
| Z057  | -     | 31.29 | - | - | + | + |
| Z058  | 23.86 | 24.03 | - | - | - | - |
| Z059  | -     | 25.96 | - | - | + | + |
| Z060  | 20.87 | 21.54 | - | + | + | + |
| Z061  | 21.48 | 22.28 | + | + | - | - |
| Z062  | 27.13 | 27.25 | - | - | - | - |
| Z063* | -     | -     | - | - | + | + |
| Z064  | 23.42 | 24.56 | + | + | - | - |
| Z065  | 25.59 | 25.96 | - | - | + | + |
| Z066  | -     | 22.84 | + | + | - | - |
| Z067  | 19.80 | 22.07 | - | - | + | + |
| Z068  | 28.13 | 24.78 | - | + | + | + |
| Z069  | 26.77 | 20.07 | - | + | + | + |

|       |       |       |   |   |   |   |
|-------|-------|-------|---|---|---|---|
| Z070  | 30.82 | 31.31 | - | - | + | + |
| Z071  | 36.06 | 39.29 | - | - | - | - |
| Z072  | 26.02 | 27.00 | - | - | - | - |
| Z073  | -     | -     | - | - | - | - |
| Z074  | 22.70 | 22.33 | - | - | - | - |
| Z075  | 27.28 | 28.26 | - | - | - | - |
| Z076  | 22.55 | 23.81 | + | - | + | - |
| Z077  | 26.79 | 27.44 | - | - | + | + |
| Z078  | 23.05 | 23.43 | - | - | + | + |
| Z079  | 24.85 | 25.80 | + | - | + | + |
| Z080  | -     | -     | - | - | - | - |
| Z081  | 34.94 | 35.08 | - | - | - | - |
| Z082  | 25.84 | 25.75 | - | - | - | - |
| Z083* | -     | -     | - | - | + | + |
| Z084  | -     | 21.62 | + | + | - | - |
| Z085  | 24.06 | 23.81 | - | + | + | - |
| Z086  | 32.94 | 26.78 | - | - | + | + |
| Z087  | 24.82 | 25.77 | + | - | + | + |
| Z088  | 36.57 | 37.60 | - | - | - | - |
| Z089  | 28.16 | 28.55 | - | - | + | + |
| Z090  | 31.87 | 30.31 | - | - | - | - |
| Z091  | 25.65 | 28.38 | - | - | + | + |
| Z092  | 23.56 | 24.46 | - | - | + | + |
| Z093  | 25.06 | 26.12 | - | - | + | + |
| Z094  | 27.48 | 28.83 | - | - | - | - |
| Z095  | 23.97 | 25.13 | + | - | - | - |
| Z096  | 18.55 | 18.29 | + | + | + | + |
| Z097  | 22.18 | 22.61 | + | - | + | + |
| Z098  | 22.94 | 24.06 | + | + | - | + |
| Z099  | 23.30 | 24.08 | - | + | + | + |
| Z100  | -     | 26.43 | - | - | - | - |
| Z101  | -     | -     | - | - | - | - |
| Z102  | -     | -     | - | - | - | - |
| Z103  | 32.59 | 28.90 | - | - | + | + |
| Z104  | -     | 22.14 | + | + | - | - |
| Z105  | 29.89 | 36.74 | - | - | + | + |

|              |           |            |           |           |           |           |
|--------------|-----------|------------|-----------|-----------|-----------|-----------|
| Z106         | 29.65     | 30.32      | -         | -         | +         | +         |
| Z107         | 18.48     | 19.91      | +         | +         | -         | -         |
| Z108         | 27.10     | 27.02      | -         | -         | -         | -         |
| Z109         | 32.96     | 33.05      | -         | -         | +         | +         |
| Z110         | 23.53     | 23.28      | -         | -         | +         | +         |
| Z111         | 21.22     | 22.89      | -         | -         | -         | -         |
| Z112         | 24.51     | 23.71      | +         | -         | -         | -         |
| Z113         | 20.75     | 21.63      | +         | +         | -         | -         |
| Z114         | 26.23     | 27.31      | -         | -         | -         | -         |
| Z115         | 22.81     | 23.12      | -         | +         | +         | -         |
| Z116         | 35.85     | 36.20      | -         | -         | +         | -         |
| Z117         | 21.05     | 22.11      | +         | +         | -         | -         |
| Z118         | 34.58     | 32.84      | -         | -         | +         | +         |
| Z119         | 22.58     | 24.18      | -         | -         | +         | +         |
| Z120         | 23.48     | 24.55      | -         | -         | +         | -         |
| <b>Total</b> | <b>97</b> | <b>108</b> | <b>29</b> | <b>29</b> | <b>71</b> | <b>57</b> |

MAC, MacConkey agar; CH-ECC, CHROMagar™ ECC agar; RBA-NT, Rainbow® Agar O157;  
 CH-STECC, CHROMagar™ STECC agar.

\*The two *stx*-negative samples yielded STECC isolates.
